# Supplementary material for: Tailoring π-conjugated dithienosilole–benzothiadiazole oligomers for organic solar cells
Source: Royal Society of Chemistry journal article supplement (doi:10.1039/c4nj02350a), 2015-01-01
Supplement: c4nj02350a1.pdf [file c4nj02350a1.pdf]

## Supplementary Information for

# Tailoring $\pi$ -Conjugated Dithienosilole–Benzothiadiazole Oligomers for Organic Solar Cells

Xuelong Huang, Guichuan Zhang, Cheng Zhou, Shengjian Liu, Jie Zhang, Lei Ying,\* Fei Huang,\* Yong Cao

State Key Laboratory of Luminescent Materials and Devices, and Institute of Polymer Optoelectronic Materials and Devices, South China University of Technology, Guangzhou 510640, China.

### Content:

**Figure S1.**  $^1\text{H}$  - NMR spectrum of **DA** in  $\text{CDCl}_3$ .

**Figure S2.**  $^{13}\text{C}$  - NMR spectrum of **DA** in  $\text{CDCl}_3$ .

**Figure S3.**  $^1\text{H}$  - NMR spectrum of **ADA** in  $\text{CDCl}_3$ .

**Figure S4.**  $^{13}\text{C}$  - NMR spectrum of **ADA** in  $\text{CDCl}_3$ .

**Figure S5.**  $^1\text{H}$  - NMR spectrum of **DAD** in  $\text{CDCl}_3$ .

**Figure S6.**  $^{13}\text{C}$  - NMR spectrum of **DAD** in  $\text{CDCl}_3$ .

**Figure S7.**  $^1\text{H}$  - NMR spectrum of **DADAD** in  $\text{CDCl}_3$ .

**Figure S8.**  $^{13}\text{C}$  - NMR spectrum of **DADAD** in  $\text{CDCl}_3$ .

**Figure S8.**  $^{13}\text{C}$  - NMR spectrum of **DADAD** in  $\text{CDCl}_3$ .

**Figure S9.**  $^1\text{H}$  - NMR spectrum of **dBr-ADA** in  $\text{CDCl}_3$ .

**Figure S10.**  $^{13}\text{C}$  - NMR spectrum of **dBr-ADA** in  $\text{CDCl}_3$ .

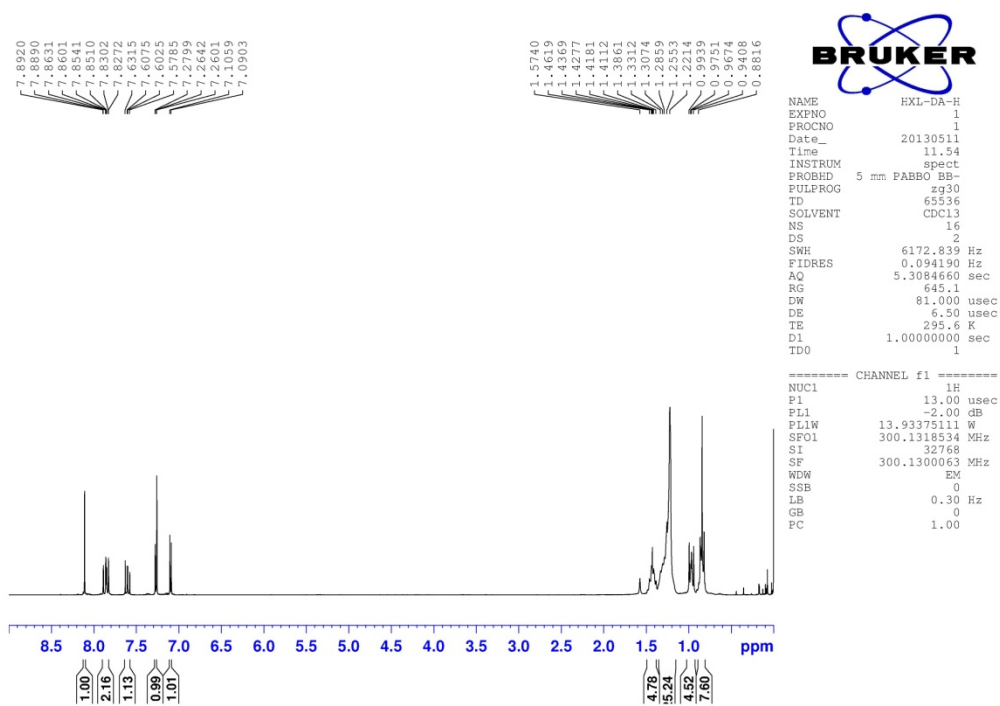

Figure S1.  $^1\text{H}$  - NMR spectrum of DA in  $\text{CDCl}_3$ .

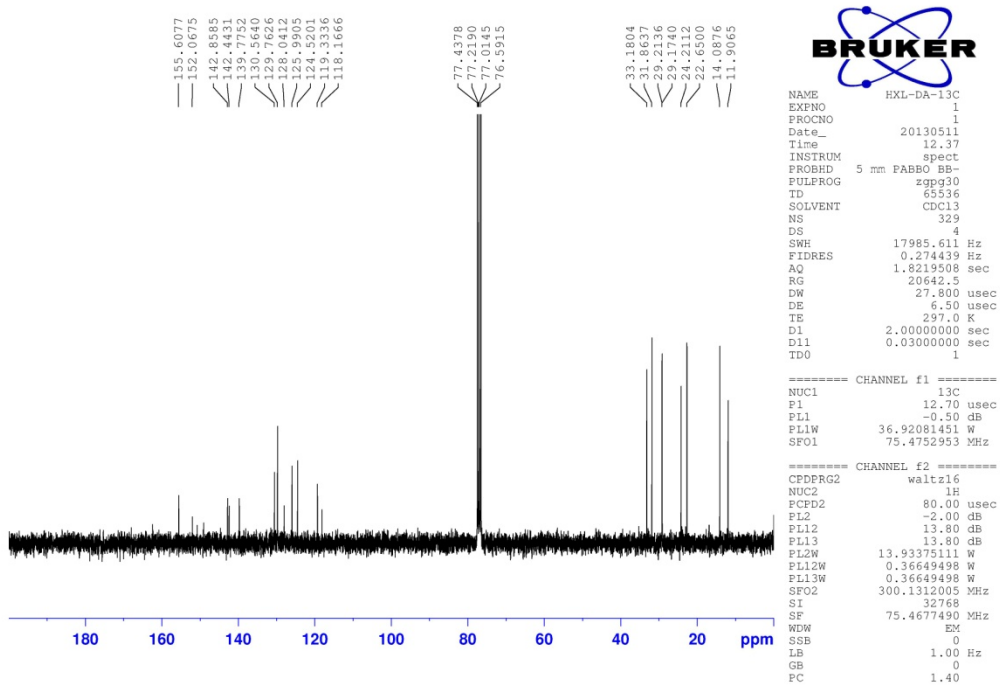

Figure S2.  $^{13}\text{C}$  - NMR spectrum of DA in  $\text{CDCl}_3$ .

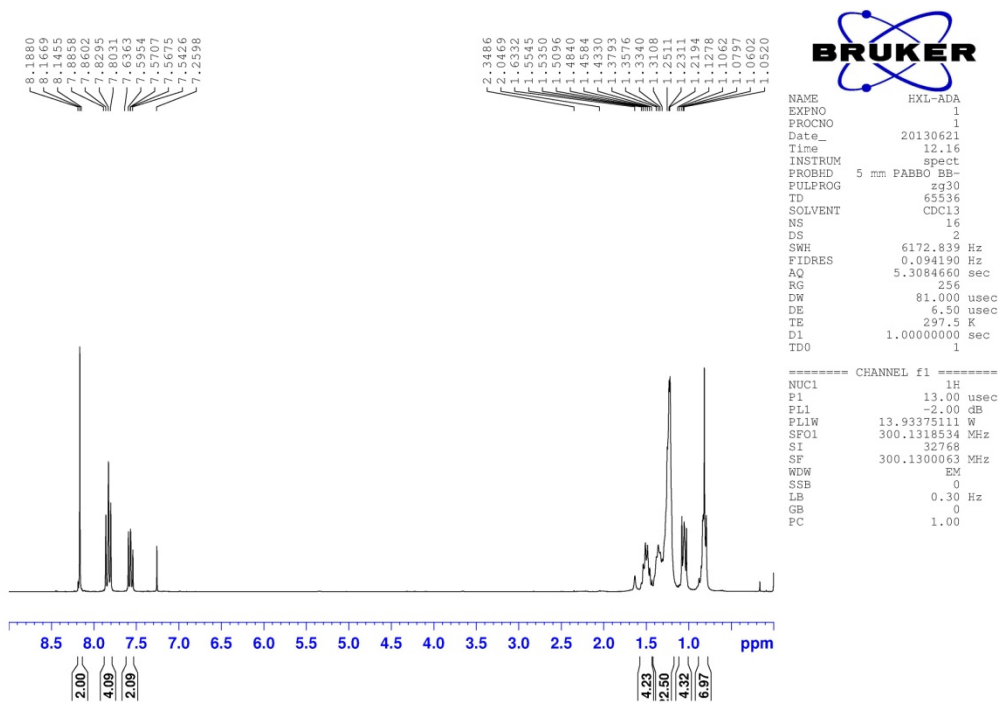

Figure S3.  $^1\text{H}$  - NMR spectrum of ADA in  $\text{CDCl}_3$ .

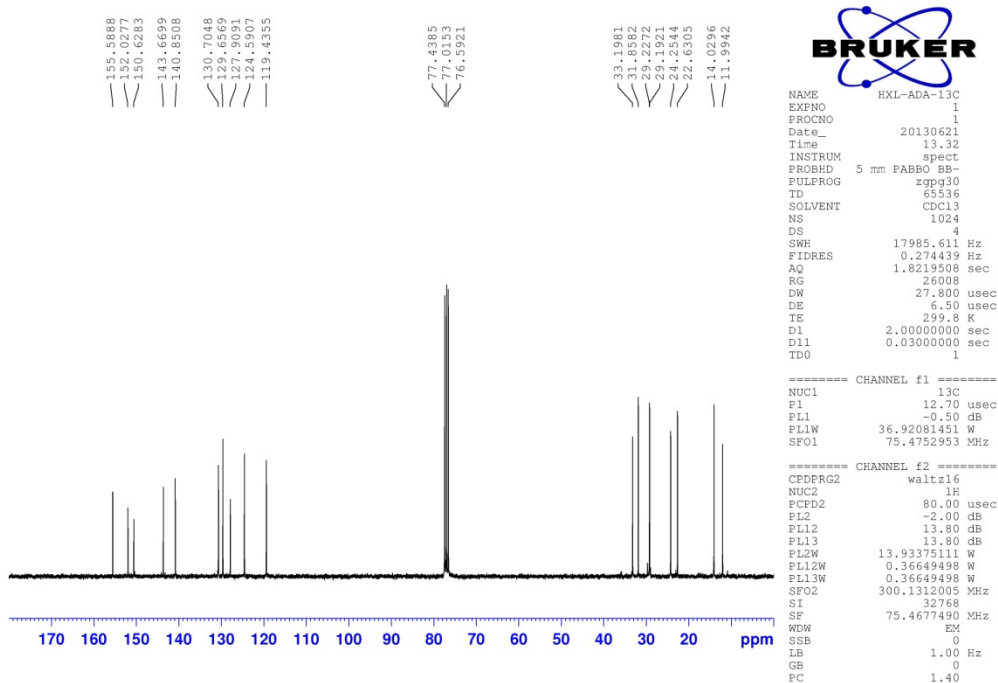

Figure S4.  $^{13}\text{C}$  - NMR spectrum of ADA in  $\text{CDCl}_3$ .

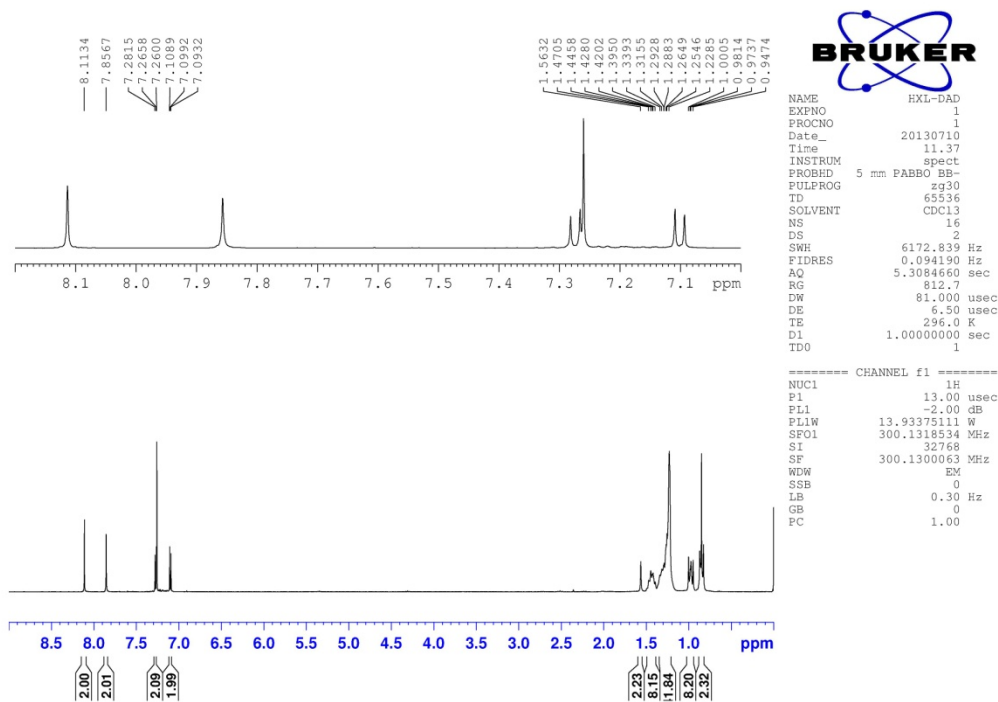

Figure S5.  $^1\text{H}$  - NMR spectrum of **DAD** in  $\text{CDCl}_3$ .

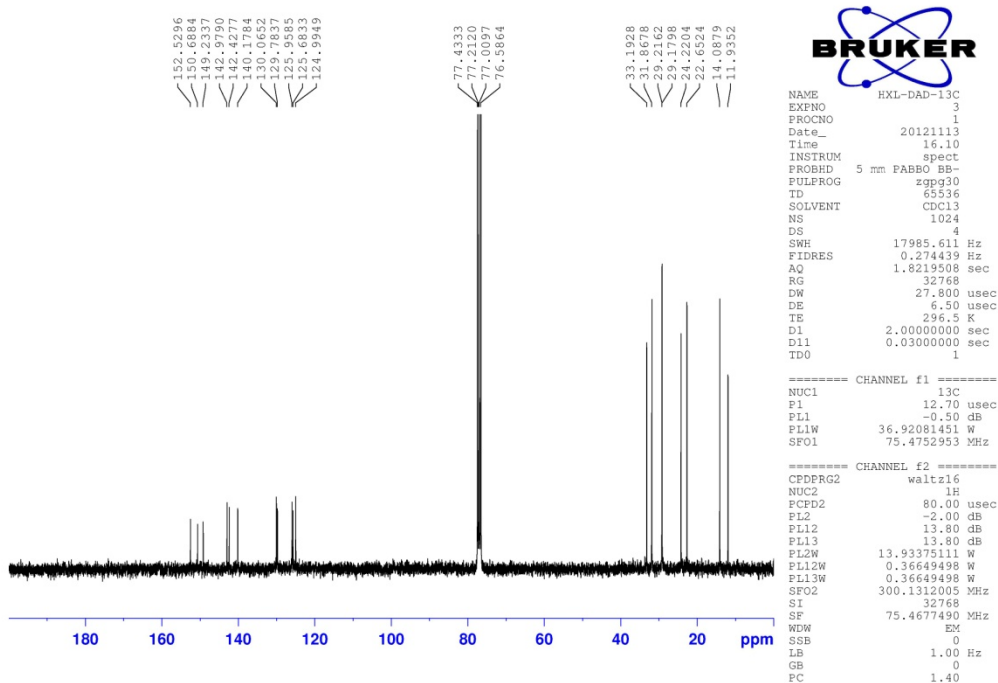

Figure S6.  $^{13}\text{C}$  - NMR spectrum of **DAD** in  $\text{CDCl}_3$ .

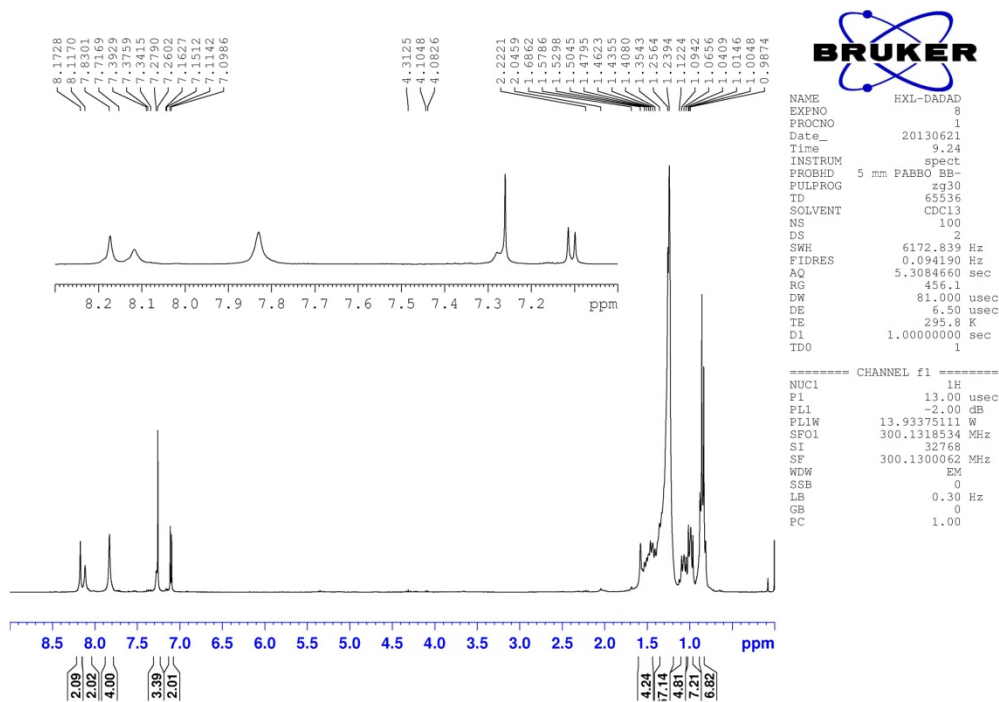

Figure S7. <sup>1</sup>H - NMR spectrum of **DADAD** in CDCl<sub>3</sub>.

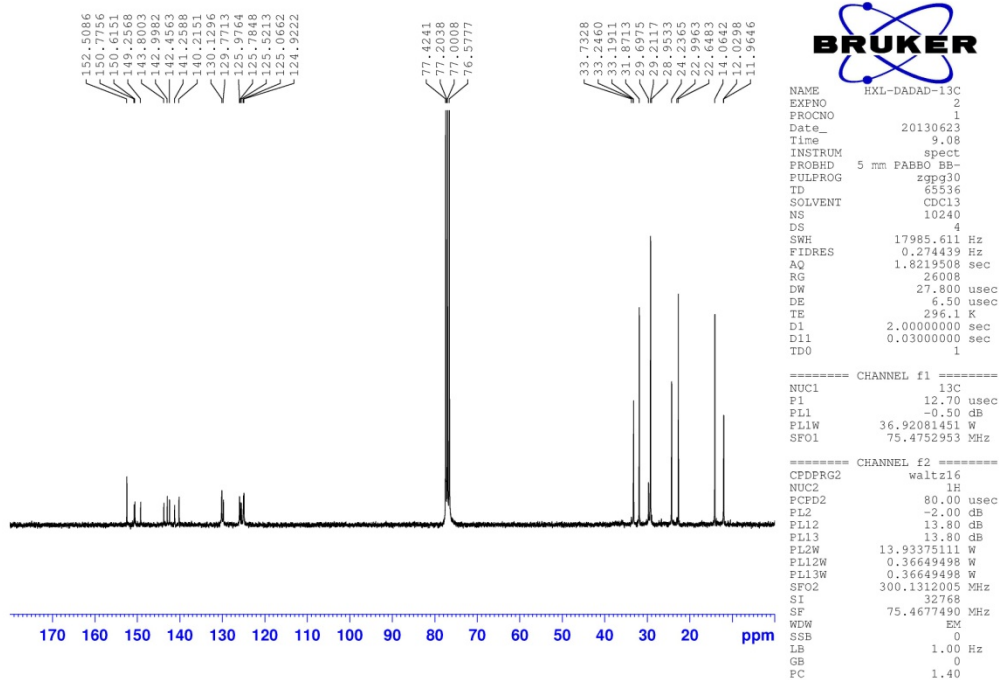

Figure S8. <sup>13</sup>C - NMR spectrum of **DADAD** in CDCl<sub>3</sub>.

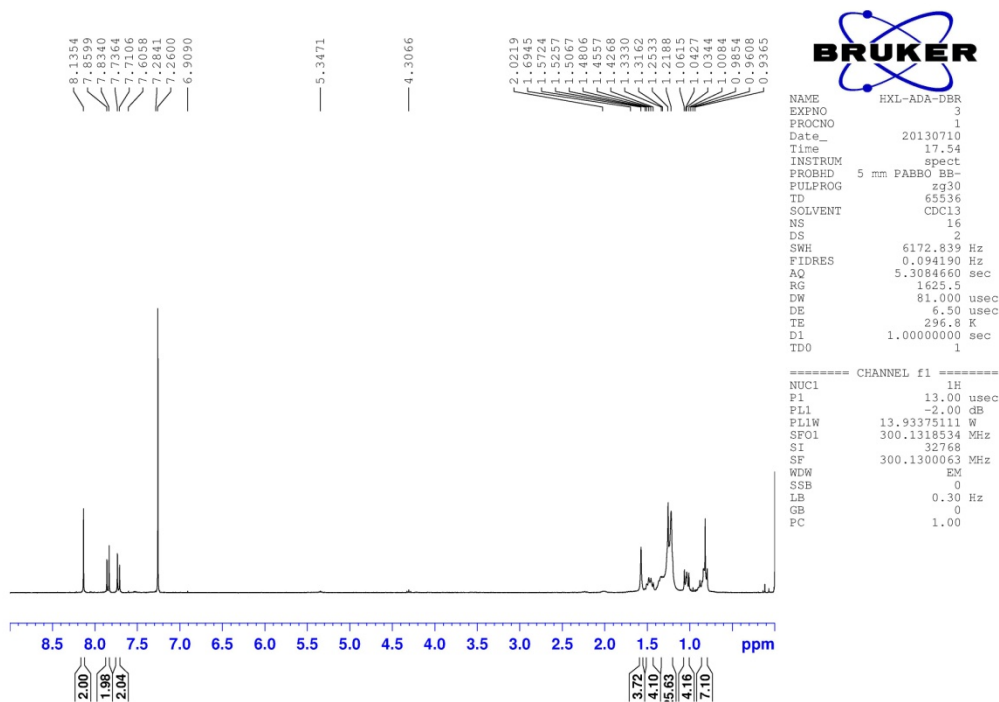

Figure S9.  $^1\text{H}$  - NMR spectrum of dBr-ADA in  $\text{CDCl}_3$ .

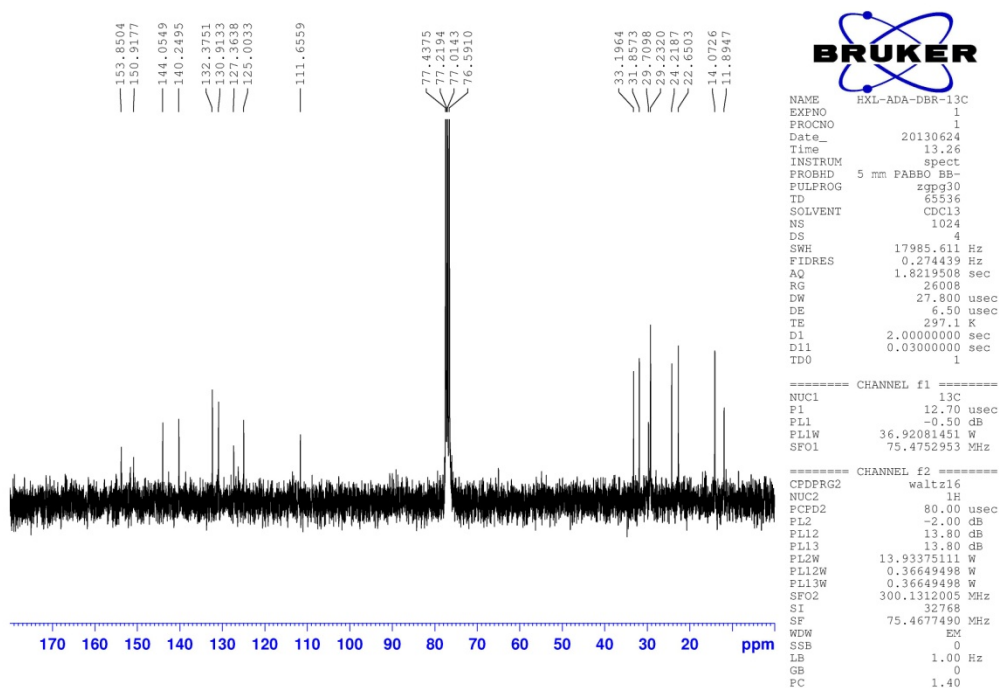

Figure S10.  $^{13}\text{C}$  - NMR spectrum of dBr-ADA in  $\text{CDCl}_3$ .
